# Supplementary material for: An artificial cathode-electrolyte interphase with flame retardant capability enabled by an organophosphorus compound for lithium metal batteries
Source: Royal Society of Chemistry journal article supplement (doi:10.1039/d3ta04347a), 2023-12-19
Supplement: d3ta04347a1.pdf [file d3ta04347a1.pdf]

## Supplementary Information

# An artificial cathode-electrolyte interphase with flame retardant capability enabled by organophosphorus compound for lithium metal batteries

Taehoon Kim<sup>a,\*</sup>

<sup>a</sup> Department of Safety Engineering, Incheon National University (INU), 119 Academy-ro, Yeonsu-gu, Incheon 22012, Republic of Korea.

\*E-mail: kths@inu.ac.kr

**Table S1.** Comparison of similar works on the A-CEI with key features.

| CEI thickness | Capacity decrease   | Flame retardant property                                  | Reference No.    |
|---------------|---------------------|-----------------------------------------------------------|------------------|
| < 10 nm       | 13 % on 100 cycles  | None                                                      | Ref <sup>1</sup> |
| < 50 nm       | 16 % on 100 cycles  | None                                                      | Ref <sup>2</sup> |
| ~10 nm        | 31 % on 100 cycles  | None                                                      | Ref <sup>3</sup> |
| 12 ~ 17 nm    | 28 % on 100 cycles  | None                                                      | Ref <sup>4</sup> |
| < 10 nm       | 9.4 % on 100 cycles | Strong<br>(Based on chain reaction inhibition<br>by DMMP) | <b>This work</b> |

1 W. Li, D. Cheng, R. Shimizu, Y. Li, W. Yao, G. Raghavendran, M. Zhang and Y. S. Meng, *Energy Storage Mater.*, 2022, **49**, 77–84.

2 T. T. Zuo, F. Walther, S. Ahmed, R. Rueß, J. Hertle, B. Mogwitz, K. Volz and J. Janek, *ACS Energy Lett.*, 2023, **8**, 1322–1329.

3 L. Liu, W. Dai, H. Zhu, Y. Gu, K. Wang, C. Li, C. Pan, M. Zhou and J. Liu, *Nanomaterials*, 2021, **11**, 1–10.

4 I. Moez, D. Susanto, W. Chang, H. D. Lim and K. Y. Chung, *Chem. Eng. J.*, 2021, **425**, 130547.

**Table S2.** The XPS peak identifications of Ni 2p, Mn 2p, O 1s, C1s, F 1s, and Li 1s with quantifications for the  $\text{LiNi}_{0.8}\text{Mn}_{0.1}\text{Co}_{0.1}\text{O}_2$  (NMC811) cathode at reference state (REF) and cycled state (x100). The electrochemical cycling was carried out in the voltage range between 2.8 V and 4.3 V with C-rate.

| O 1s peak location [REF]                   | % concentration | Identified composites/species                                                         |
|--------------------------------------------|-----------------|---------------------------------------------------------------------------------------|
| ~529.5 eV                                  | 14.33           | Lattice oxygen                                                                        |
| ~531.7 eV                                  | 78.22           | Surface oxygen (from TM)                                                              |
| ~533.9 eV                                  | 7.45            | Ether oxygen (C-O)                                                                    |
| O 1s peak location [NMC811/normal SP x100] | % concentration | Identified composites/species                                                         |
| ~529.07 eV                                 | 3.30            | Lattice oxygen                                                                        |
| ~531.6 eV                                  | 53.44           | Surface oxygen (from TM)                                                              |
| ~532.4 eV                                  | 33.44           | Metal carbonate ( $\text{Li}_2\text{CO}_3$ )<br>(* 531.9 can be also metal carbonate) |
| ~533.8 eV                                  | 9.81            |                                                                                       |
| O 1s peak location [NMC811/PHDP30 x100]    | % concentration | Identified composites/species                                                         |
| ~529.1 eV                                  | 3.04            | Surface oxygen (from TM)                                                              |
| ~531.6 eV                                  | 90.88           | Surface oxygen (from TM)                                                              |
| ~533.9 eV                                  | 6.08            | Ether oxygen (C-O)                                                                    |

| C 1s peak location [REF]                   | % concentration | Identified composites/species |
|--------------------------------------------|-----------------|-------------------------------|
| ~284.6 eV                                  | 61.03           | Carbon (calibrated)           |
| ~285.9 eV                                  | 30.57           | -CH from PVDF binder          |
| ~290.3 eV                                  | 8.41            | -CF from PVDF binder          |
| C 1s peak location [NMC811/normal SP x100] | % concentration | Identified composites/species |
| ~284.6 eV                                  | 51.33           | Carbon (calibrated)           |
| ~285.5 eV                                  | 38.42           | CH from PVDF binder           |
| ~290.0 eV                                  | 10.25           | -CF from PVDF binder          |
| C 1s peak location [NMC811/PHDP30 x100]    | % concentration | Identified composites/species |

|           |       |                      |
|-----------|-------|----------------------|
| ~284.6 eV | 50.82 | Carbon (calibrated)  |
| ~285.6 eV | 35.99 | CH from PVDF binder  |
| ~289.8 eV | 13.19 | -CF from PVDF binder |

| F 1s peak location [REF]                   | % concentration | Identified composites/species                  |
|--------------------------------------------|-----------------|------------------------------------------------|
| ~684.8 eV                                  | 14.01           | LiF                                            |
| ~687.1 eV                                  | 85.99           | F from PVDF                                    |
| F 1s peak location [NMC811/normal SP x100] | % concentration | Identified composites/species                  |
| ~684.8 eV                                  | 50.26           | LiF                                            |
| ~686.0 eV                                  | 28.26           | Li <sub>x</sub> PO <sub>y</sub> F <sub>z</sub> |
| ~687.0 eV                                  | 21.48           | F from PVDF                                    |
| F 1s peak location [NMC811/PHDP30 x100]    | % concentration | Identified composites/species                  |
| ~684.9 eV                                  | 92.46           | LiF                                            |
| ~686.9 eV                                  | 7.54            | F from PVDF                                    |

| P 2p peak location [NMC811/normal SP x100] | % concentration | Identified composites/species                             |
|--------------------------------------------|-----------------|-----------------------------------------------------------|
| ~130.2 eV                                  | 6.95            |                                                           |
| ~133.7 eV                                  | 49.87           | Li <sub>x</sub> PO <sub>y</sub> F <sub>z</sub>            |
| ~136.9 eV                                  | 43.18           | -PF from Li <sub>x</sub> PF <sub>y</sub>                  |
| P 2p peak location [NMC811/PHDP30 x100]    | % concentration | Identified composites/species                             |
| ~133.7 eV                                  | 67.88           | Li <sub>x</sub> PO <sub>y</sub> F <sub>z</sub> (from LiF) |
| ~136.5 eV                                  | 32.12           |                                                           |

|                                                |                 |                                                |
|------------------------------------------------|-----------------|------------------------------------------------|
| Li 1s peak location<br>[REF]                   | % concentration | Identified composites/species                  |
| ~55.9 eV                                       | 100             | Metallic Lithium                               |
| Li 1s peak location<br>[NMC811/normal SP x100] | % concentration | Identified composites/species                  |
| ~54.9 eV                                       | 8.82            | Li <sub>2</sub> CO <sub>3</sub>                |
| ~55.5 eV                                       | 73.53           | LiF                                            |
| ~56.3 eV                                       | 17.65           | Li <sub>x</sub> PO <sub>y</sub> F <sub>z</sub> |
| Li 1s peak location<br>[NMC811/PHDP30 x100]    | % concentration | Identified composites/species                  |
| ~54.3 eV                                       | 9.56            | Li <sub>2</sub> CO <sub>3</sub>                |
| ~55.6 eV                                       | 90.44           | Metallic Lithium                               |

**Table S3.** Thickness data of the cross-sectional observation on the corresponded electrodes in Fig. 4.

| Electrode type                    | Thickest part      | Mean thickness     |
|-----------------------------------|--------------------|--------------------|
| NMC811 (REF)                      | 23.1 $\mu\text{m}$ | 20.1 $\mu\text{m}$ |
| NMC811/normal SP<br>(x100 cycled) | 23.5 $\mu\text{m}$ | 20.5 $\mu\text{m}$ |
| NMC811/PHDP30<br>(x100 cycled)    | 30.7 $\mu\text{m}$ | 28.0 $\mu\text{m}$ |

**Table S4.** EIS fitting results on the Li-metal/Li(Ni<sub>0.8</sub>Mn<sub>0.1</sub>Co<sub>0.1</sub>)O<sub>2</sub> cell and the Li-metal/Li(Ni<sub>0.8</sub>Mn<sub>0.1</sub>Co<sub>0.1</sub>)O<sub>2</sub>/PHDP30 cell with its equivalent circuit. The cells were cycled in the voltage range of 2.8 – 4.3 V for 100 times with C-rate.

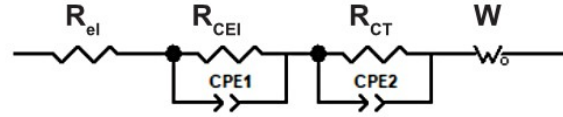

**At reference state (REF)**

| Sample                   | $R_{el}$ ( $\Omega$ ) | $R_{CT}$ ( $\Omega$ ) |
|--------------------------|-----------------------|-----------------------|
| Li-metal/normal SP (REF) | 5.9                   | 580.2                 |
| Li-metal/PHDP30 (REF)    | 1.3                   | 454.4                 |

**After 100 cycling**

| Sample                           | $R_{el}$ ( $\Omega$ ) | $R_{CEI}$ ( $\Omega$ ) | $R_{CT}$ ( $\Omega$ ) |
|----------------------------------|-----------------------|------------------------|-----------------------|
| Li-metal/normal SP (x100 cycled) | 6.8                   | 32.2                   | 107.3                 |
| Li-metal/PHDP30 (x100 cycled)    | 5.0                   | 19.3                   | 38.9                  |

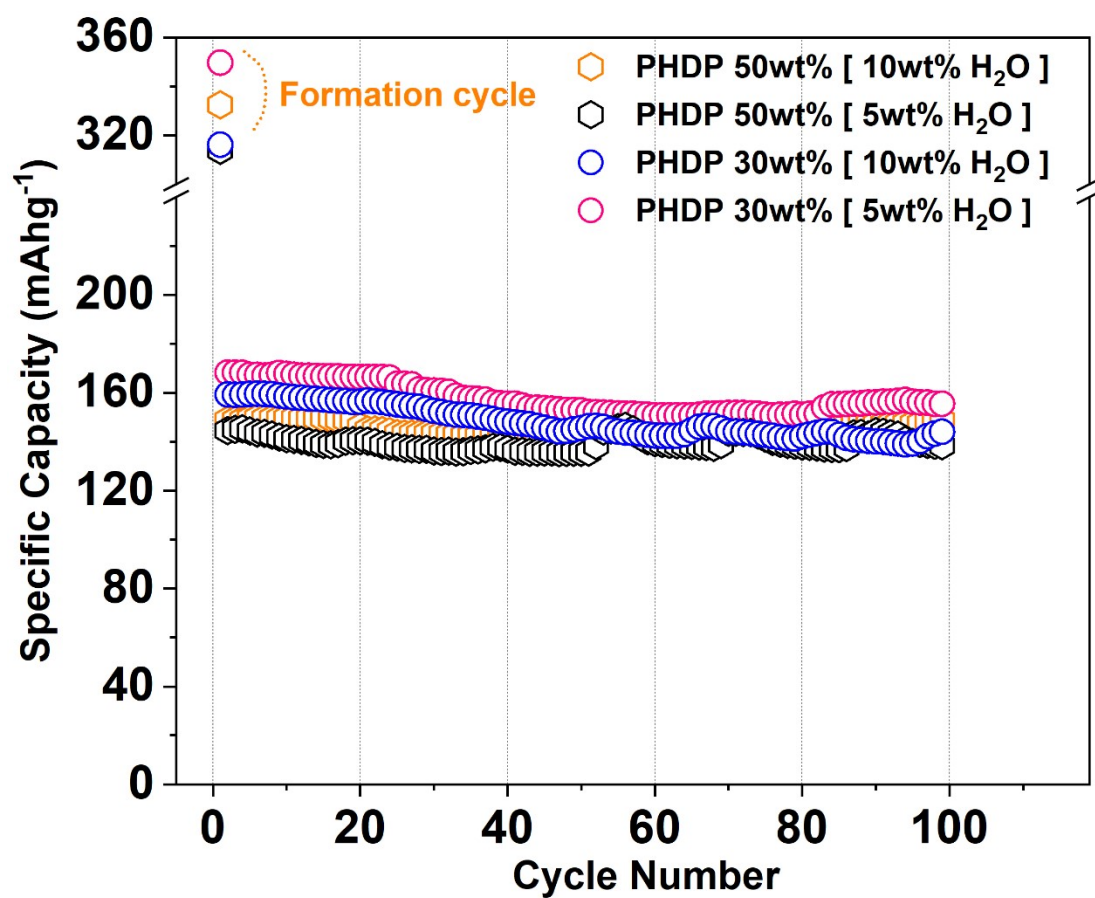

**Fig. S1.** Comparison of cycling performance between different DMMP concentrations. All cells (Li-metal/ $\text{Li}(\text{Ni}_{0.8}\text{Mn}_{0.1}\text{Co}_{0.1})\text{O}_2$ ) were cycled for 100 times in the voltage range of 2.8 – 4.3 V with C-rate.

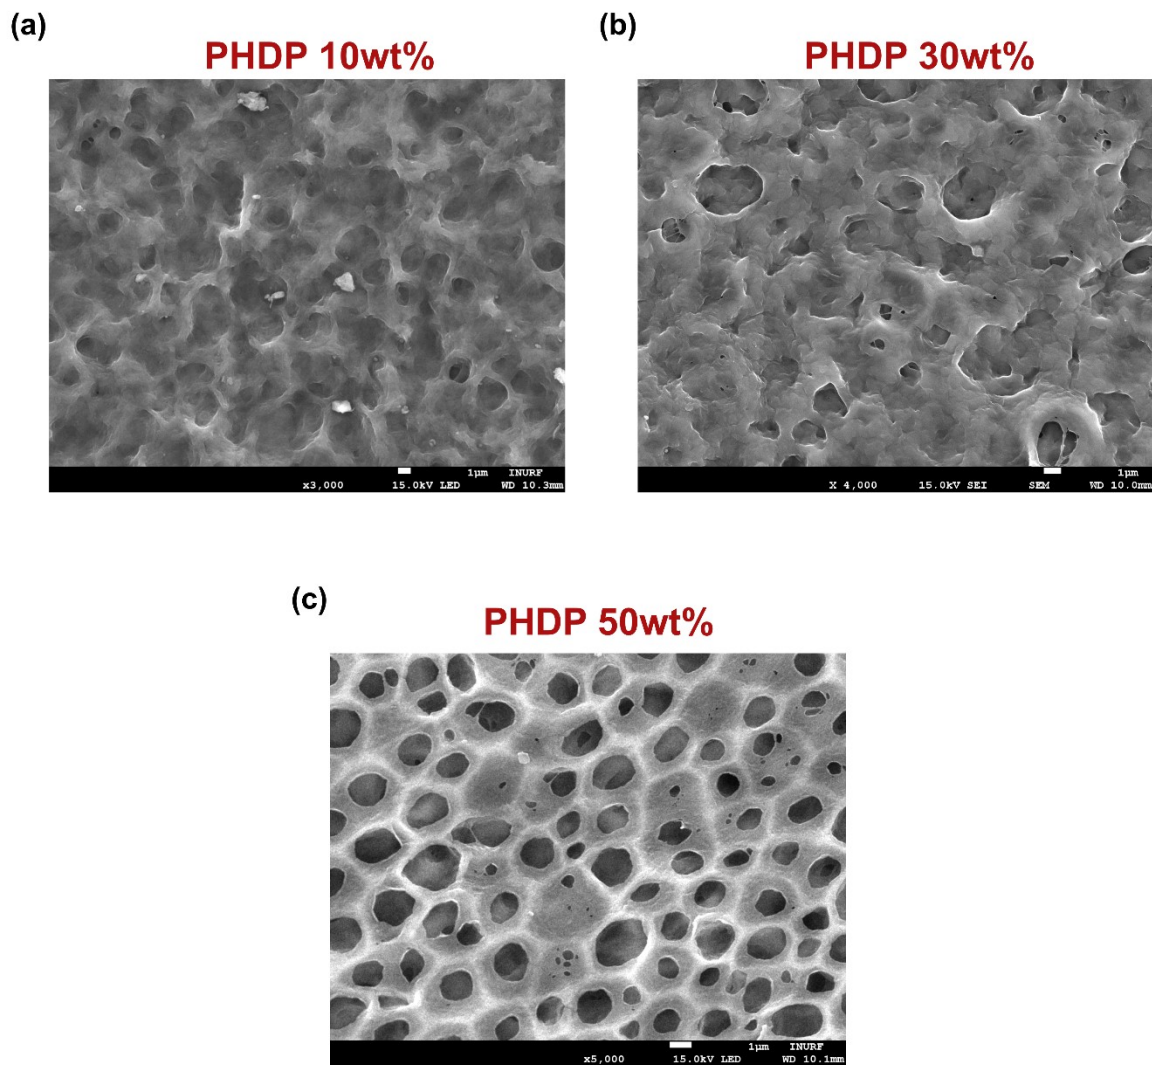

**Fig. S2.** Porous structure of DMMP(10 wt %)/PVDF-HFP (PHDP 10 wt %), DMMP(30 wt %)/PVDF-HFP (PHDP 30wt%), and DMMP(50 wt %)/PVDF-HFP (PHDP 50 wt %) membranes.

(a)

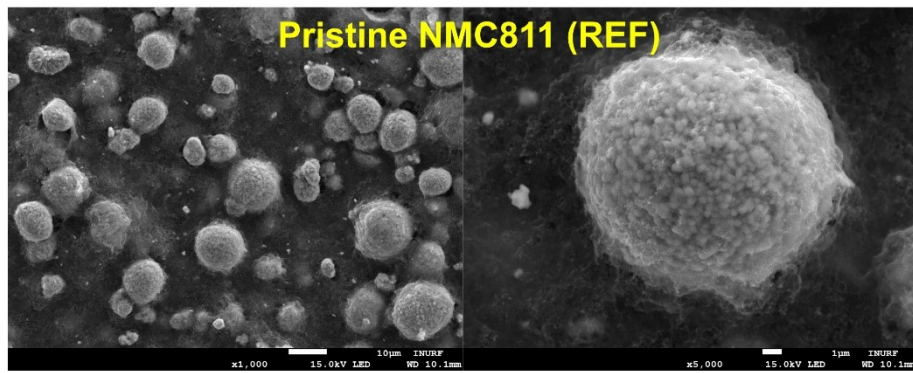

(b)

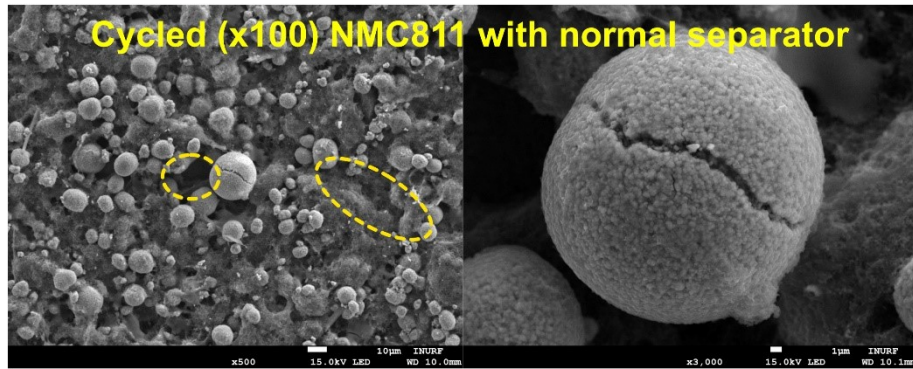

(c)

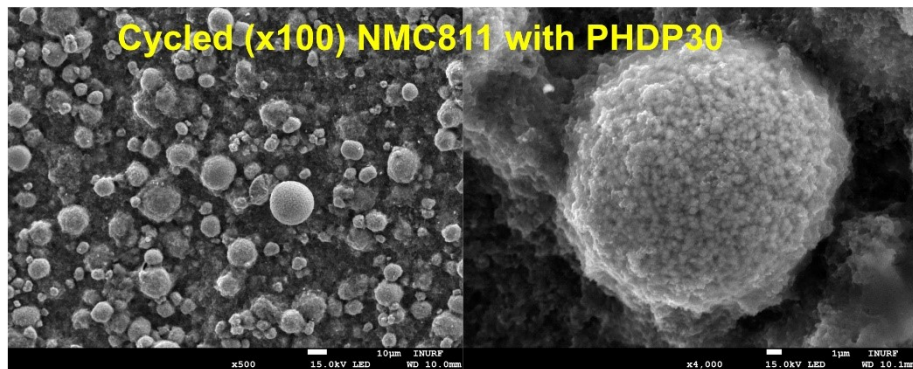

**Fig. S3.** Surface morphology of (a) pristine NMC811, (b) NMC811 cathode with polypropylene separator, and (c) with the PHDP30 A-CEI cycled for 100 times (x100) in the voltage range between 2.8 V and 4.3 V at C-rate.



(a) **Pristine state (REF)**

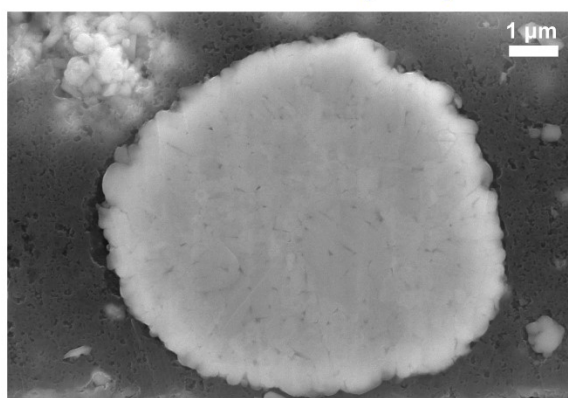

(b) **X100 cycling with PHDP30 (A-CEI)**

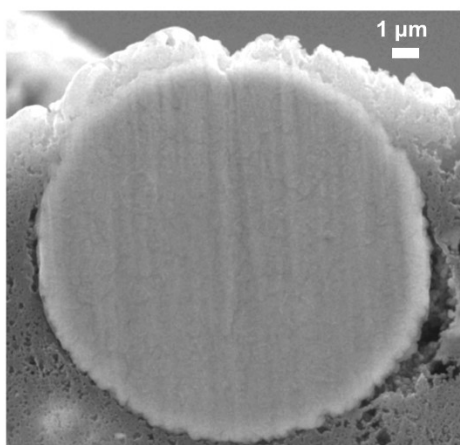

(c) **X100 cycling with normal SEP (PP)**

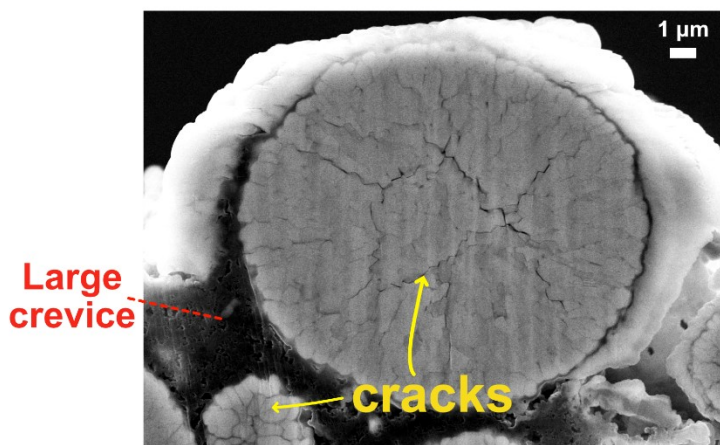

**Fig. S4.** Comparison of the cross-section of the NMC811 cathode material with high SEM magnification between (a) pristine state (REF), (b) with A-CEI cycled for 100 times, and (c) with the normal polypropylene (PP) separator cycled for 100 times.

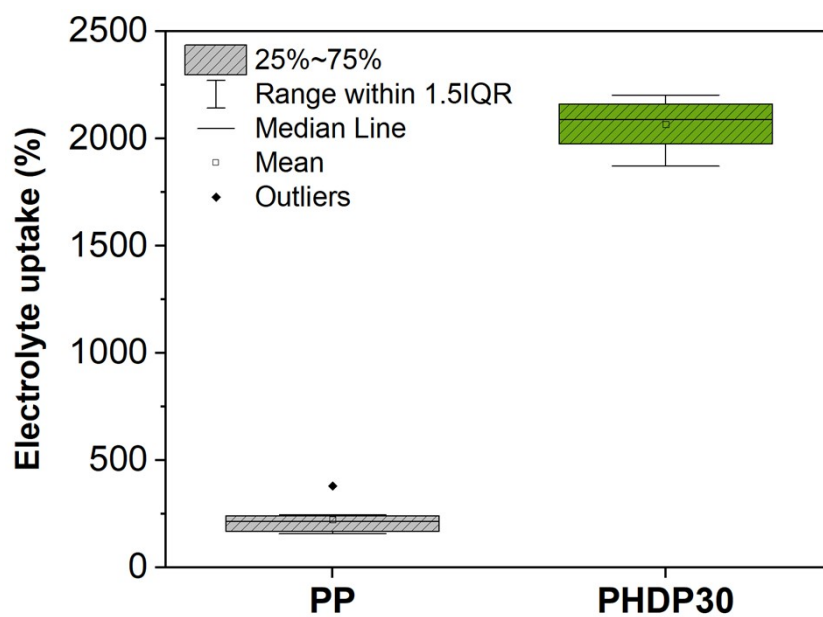

**Fig. S5.** Electrolyte uptake comparison between commercially available polypropylene (PP) separator and the PHD30 A-CEI.

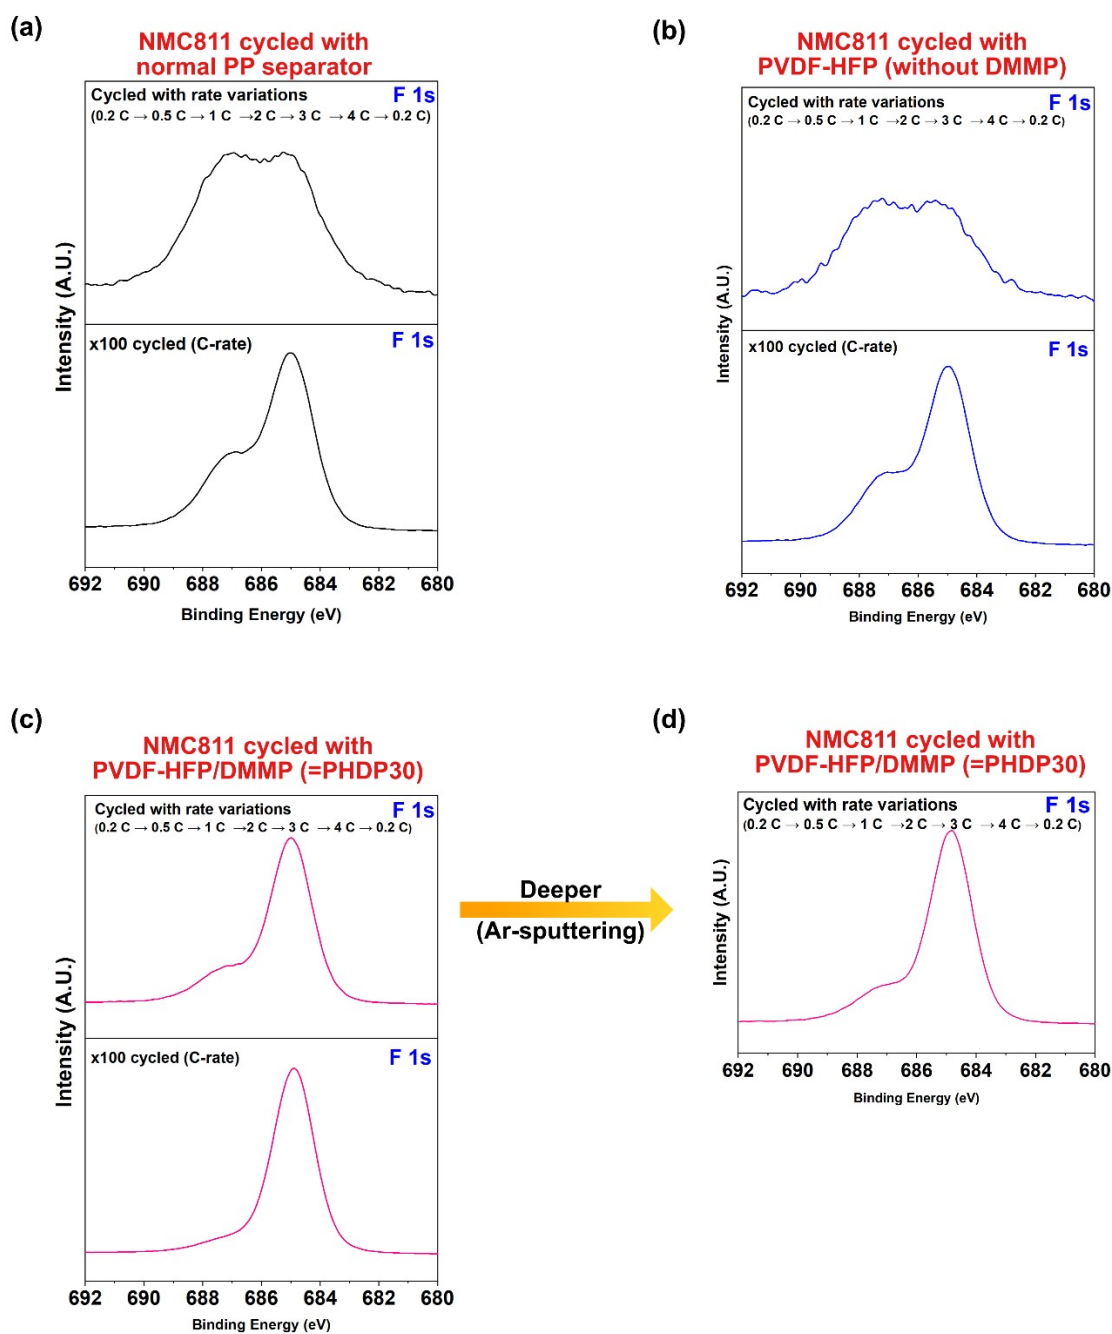

**Fig. S6.** F 1s XPS spectra on (a) NMC811 cathode cycled with normal polypropylene (PP) separator with rate variations (0.2 C, 0.5 C, 1 C, 2 C, 3 C, 4 C, and back to 0.2 C) and constant rate (C-rate) in the voltage range of 2.8 – 4.3 V. F 1s XPS spectra on (b) NMC811 cathode cycled with PVDF-HFP membrane with the rate variations and constant rate (C-rate) in the voltage range of 2.8 – 4.3 V. The PVDF-HFP membrane functions as a separator, and was synthesized as the identical method used for PHDP30 A-CEI. (c) F 1s XPS spectra on (b) NMC811 cathode cycled with PVDF-HFP/DMMP (=PHDP30 A-CEI) with the rate variations and constant rate (C-rate) in the voltage range of 2.8 – 4.3 V. (d) F 1s XPS spectra in a deeper location on NMC811 cathode cycled with PVDF-HFP/DMMP (=PHDP30 A-CEI) with the rate variations. 1 keV Ar<sup>+</sup> primary beam with a diameter of 300 mm was employed for the Ar-sputtering (time: 60 sec).

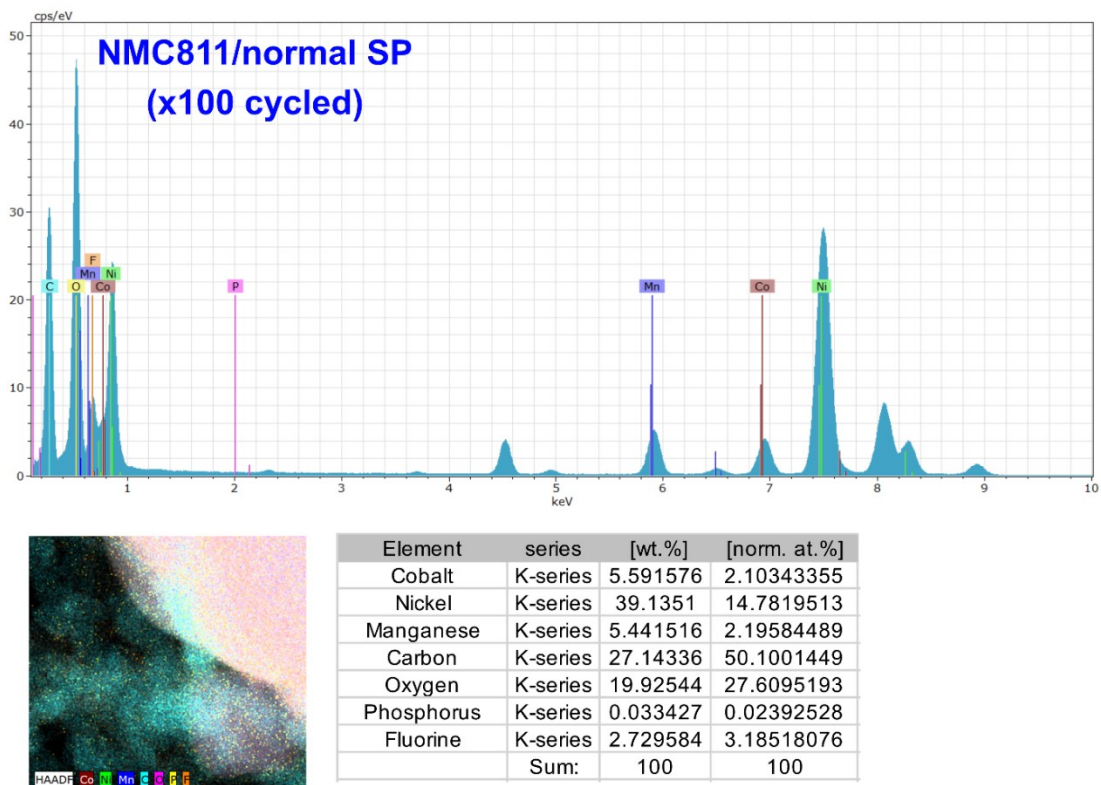

**Fig. S7.** TEM-EDS analyses of the NMC811 particle with normal separator cycled for 100 times in the voltage range between 2.8 V and 4.3 V at C-rate.

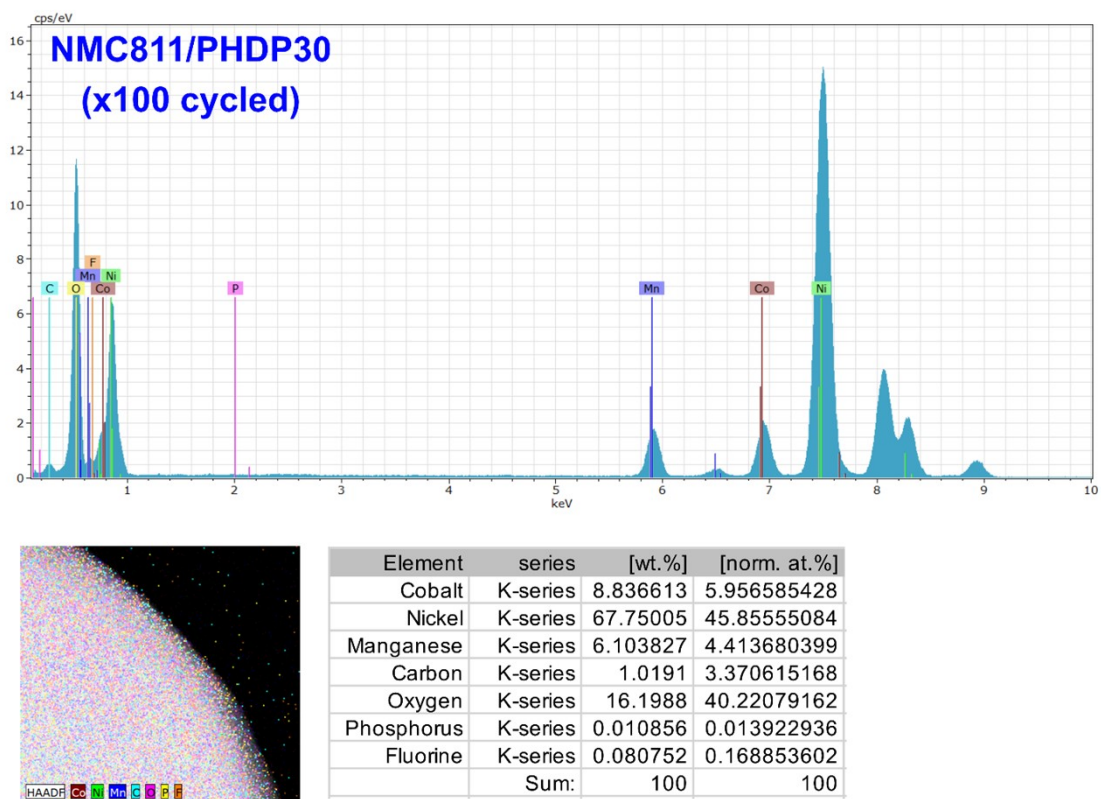

**Fig. S8.** TEM-EDS analyses of the NMC811 particle with PHDP30 cycled for 100 times in the voltage range between 2.8 V and 4.3 V at C-rate.

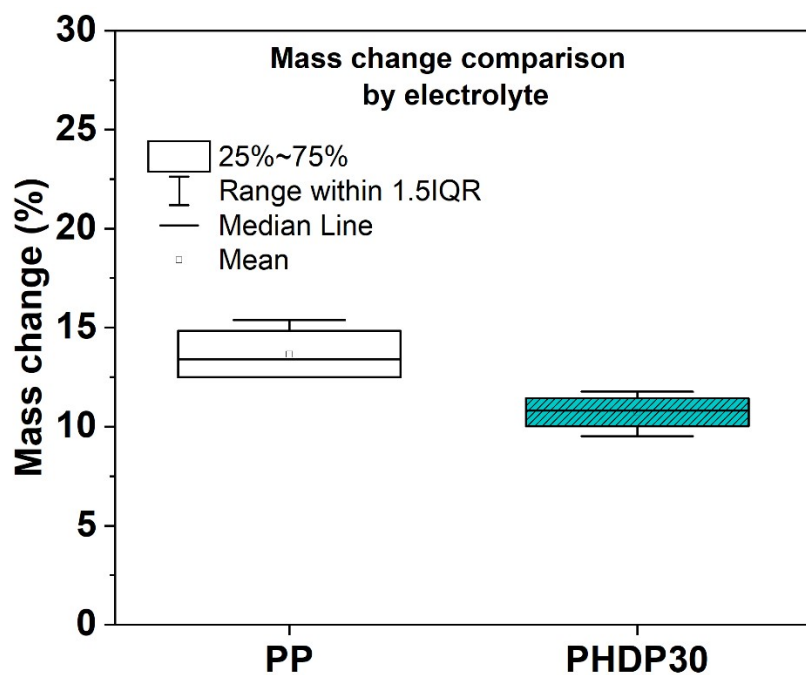

**Fig. S9.** Mass change comparison by electrolyte (LiPF<sub>6</sub> in(EC:EMC=50:50 (v/v)) between the polypropylene (PP) separator and the A-CEI (=PHDP30).

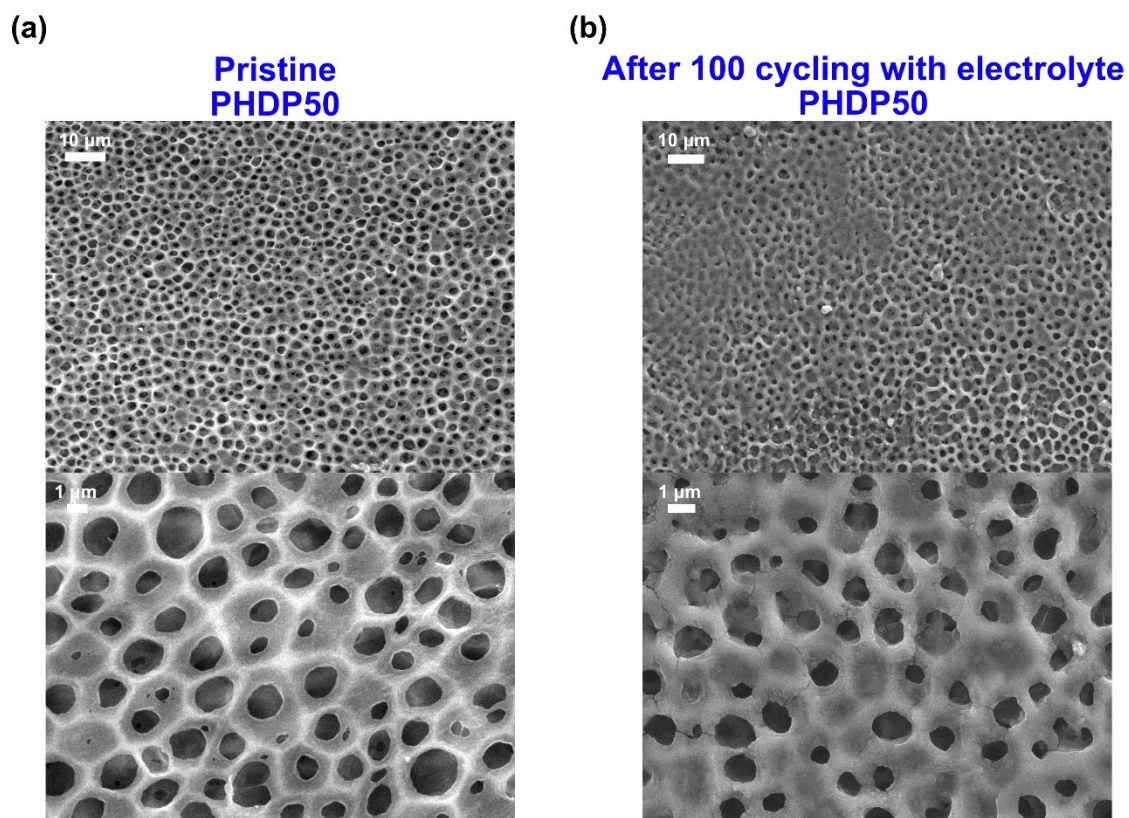

**Fig. S10.** Comparison of the membrane structure between (a) the pristine PHDP50 (50 wt % DMMP/10 wt % PVDF-HFP matrix) and (b) the cycled PHDP50 with the electrolyte for 100 times in the voltage range of 2.8 – 4.3 V (C-rate).

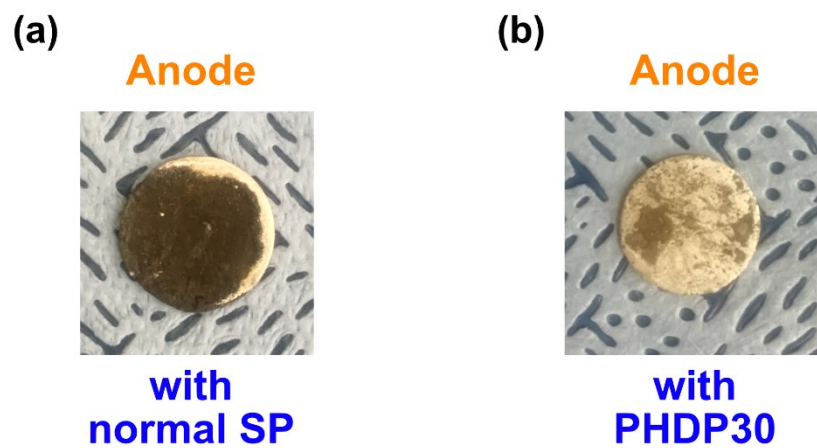

**Fig. S11.** Comparison on the lithium dendrite growth at anode between the lithium metal cell cycled with (a) normal separator (normal SP) and (b) with the A-CEI (PHDP30). The electrochemical cells were cycled for 100 times in the voltage range of 2.8 – 4.3 V at C-rate.
